# Supplementary material for: Improved base-calling and quality scores for 454 sequencing based on a Hurdle Poisson model
Source: PubMed Central journal article supplement (PMC3534400; doi:10.1186/1471-2105-13-303), 2012-11-15
Supplement: 1471-2105-13-303-S3.pdf [file 1471-2105-13-303-S3.pdf]

## Smooth functions in Hurdle Poisson model

Consider the binomial and the the Poisson component of the Hurdle Poisson model which are both modeled with several predictors  $x_{j,bc}$  and  $y_{j,bc}$

$$\begin{aligned}\text{logit}(\pi_{bc}) &= \beta_{0,bc} + \sum_{j=1}^k f_j(x_{j,bc}) \\ \log(\lambda_{bc}) &= \gamma_{0,bc} + \sum_{j=1}^l g_j(y_{j,bc})\end{aligned}$$

In this model  $f_j$  and  $g_j$  are specified using cubic smoothing splines, which can be represented as a linear combination of a set of basis functions with  $m$  knots,

$$h(z) = \sum_{r=0}^3 \delta_{0r} z^r + \sum_{s=1}^m \delta_s (z - t_s)_+^3,$$

where  $t_s$ ,  $s = 1, \dots, m$  are the  $m$  knots (e.g. Thilakarathne et al., 2011). The different predictors used in the model are given in the main text.

*Reference:* Thilakarathne, P., Clement, L., Lin, D., Shkedy, Z., Kasim, A., Talloen, W., Versele, M., and Verbeke, G. (2011). The Use of Semi-parametric Mixed Models to Analyze PamChip Peptide Array Data: an Application to an Oncology Experiment. *Bioinformatics*, 27 (20), 2859-2865.
