# Supplementary material for: Improved base-calling and quality scores for 454 sequencing based on a Hurdle Poisson model
Source: PubMed Central journal article supplement (PMC3534400; doi:10.1186/1471-2105-13-303), 2012-11-15
Supplement: 1471-2105-13-303-S5.pdf [file 1471-2105-13-303-S5.pdf]

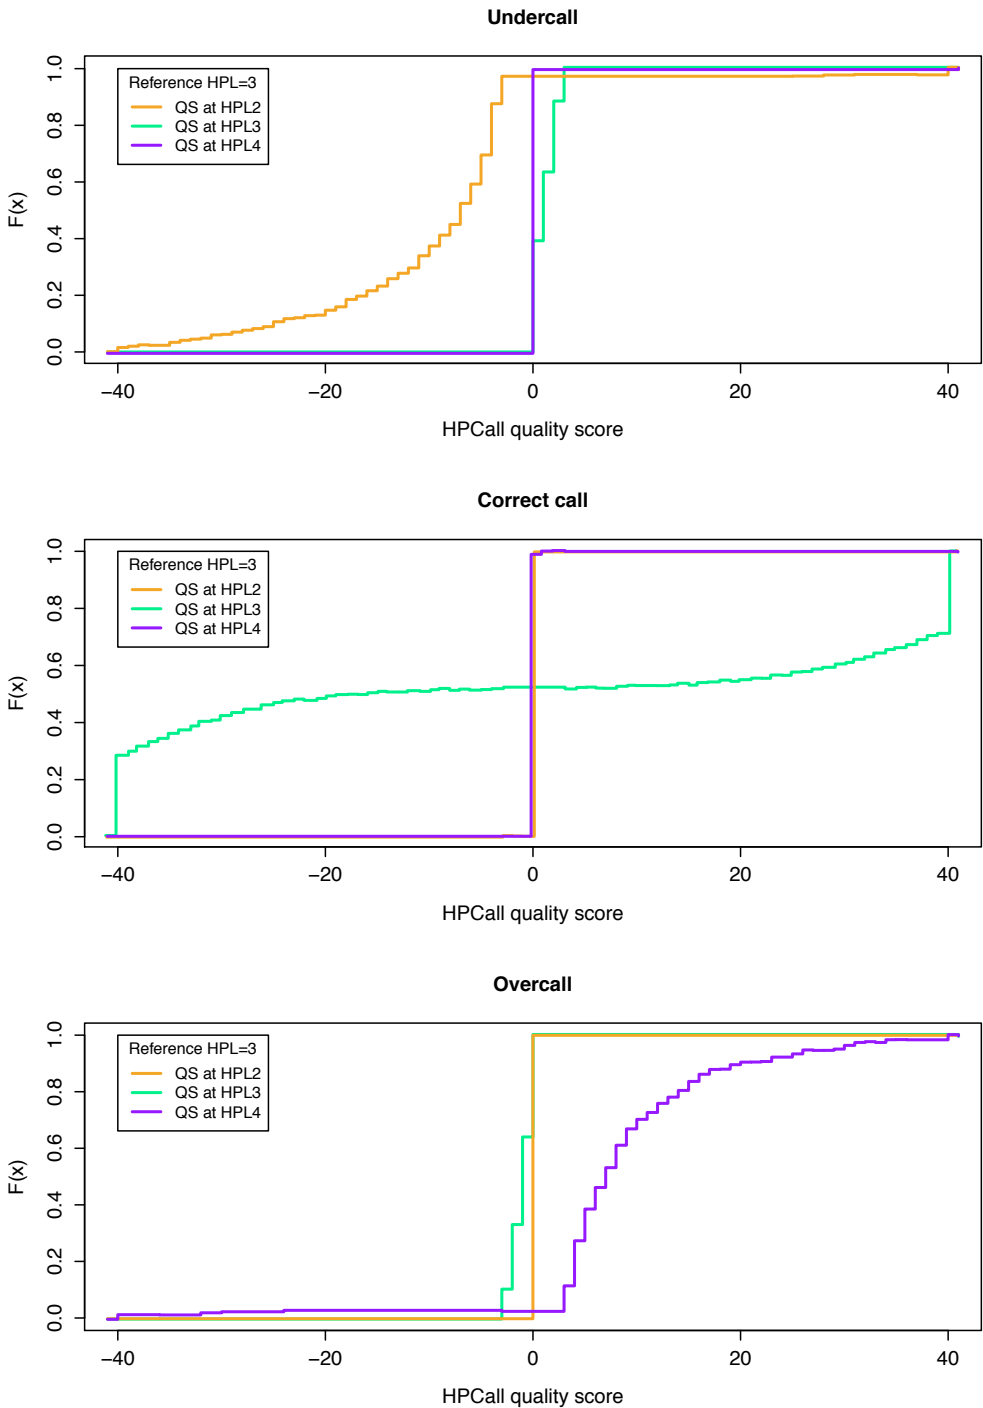

Figure 4: The empirical cumulative distribution function of HPCall quality scores  $QS_{\text{HPCall}}$  for sequences with reference HPLref 3 assigned to bases associated with HPL 2, 3 and 4, in the case of an undercall (upper), correct call (middle) or overcall (lower).
