# Supplementary material for: Improved base-calling and quality scores for 454 sequencing based on a Hurdle Poisson model
Source: PubMed Central journal article supplement (PMC3534400; doi:10.1186/1471-2105-13-303), 2012-11-15
Supplement: 1471-2105-13-303-S10.pdf [file 1471-2105-13-303-S10.pdf]

Table 2: Percentage of reads with different numbers of mismatches in the mapping between the reads produced by either HPCall or the native 454 base-caller and the *E. coli* K-12 reference sequence. For mapping either *ssaha2* or *subread* is used. HPCall results in more perfect-matching reads.

| Mapping                       | <i>ssaha2</i> |            | <i>subread</i> |            |
|-------------------------------|---------------|------------|----------------|------------|
|                               | HPCall        | native 454 | HPCall         | native 454 |
| Number of errors per read (%) |               |            |                |            |
| 0                             | 66.03         | 56.37      | 69.42          | 60.42      |
| 1                             | 22.97         | 26.78      | 22.25          | 26.08      |
| 2                             | 6.81          | 10.20      | 5.53           | 8.53       |
| 3                             | 2.45          | 3.79       | 1.81           | 3.11       |
| 4                             | 0.90          | 1.54       | 0.60           | 1.12       |
| 5                             | 0.84          | 1.32       | 0.40           | 0.74       |

Table 3: Detected number of sequence variants for the *E. coli* data set using *ssahaSNP*. HPCall results in less overall indels and SNPs.

| SNP calling             | <i>ssahaSNP</i> |            |
|-------------------------|-----------------|------------|
|                         | HPCall          | native 454 |
| Indels                  | 4954            | 8388       |
| SNPs                    | 528             | 756        |
| Total sequence variants | 5482            | 9144       |
