# Supplementary material for: Improved base-calling and quality scores for 454 sequencing based on a Hurdle Poisson model
Source: PubMed Central journal article supplement (PMC3534400; doi:10.1186/1471-2105-13-303), 2012-11-15
Supplement: 1471-2105-13-303-S11.pdf [file 1471-2105-13-303-S11.pdf]

## Base-calling of human TP53 454 amplicon resequencing data

Amplicon DNA templates of exons 4 to 7 (forward and reverse strand) in the human TP53 gene were sequenced using the Roche/454 sequencing platform. The TP53 gene encodes for a protein called tumor protein p53. This protein plays an important role in the cell cycle. By activating expression of downstream genes that inhibit growth and/or invasion, it can function as a tumor suppressor. The 90382 reads are base-called by both the native 454 base-caller and by HPCall and mapped to the TP53 reference genome using ssaha2. Table 4 shows the percentage of different numbers of mismatches, indicating that also for this data set HPCall results in more perfect-matching reads. The percentage of perfect-matching reads decreases slightly when the model is trained on the *E. coli* data set.

Table 4: Percentage of reads with different numbers of mismatches in the mapping between the reads produced by either HPCall or the native 454 base-caller and the human TP53 gene reference sequence. HPCall results in more perfect-matching reads. When trained on the *E. coli* data set, the performance decreases slightly.

|                               | native 454 | HPCall | HPCall trained on <i>E. coli</i> |
|-------------------------------|------------|--------|----------------------------------|
| Number of errors per read (%) |            |        |                                  |
| 0                             | 74.96      | 77.05  | 72.25                            |
| 1                             | 19.14      | 18.69  | 18.19                            |
| 2                             | 3.72       | 2.65   | 5.53                             |
| 3                             | 1.16       | 0.85   | 2.26                             |
| 4                             | 0.60       | 0.34   | 0.76                             |
| 5 or more                     | 0.42       | 0.42   | 1.01                             |
